# Supplementary material
Source: Springer Nature journal article supplement (https://www.springermedizin.de/resource/supplementary/13063_2013_1850_MOESM2_ESM.pdf/9620354)
Supplement: MOESM2 [file 9620354]

Conduct working groups with GPs and patients as to how to present trial and randomisation to patients

Recruit and train GPs

Patients assessed for eligibility by GPs. Eligible patients are current or ex-smokers (any duration), aged 60+ with 10 or more pack-years of smoking and with at least one of the following:

- a new or altered cough of any duration reported to primary care
- increased breathlessness or wheezing (whether or not associated with purulent sputum).

Individual  
randomisation (n=386)

Allocated to urgent chest radiograph

Allocated to NICE guidance (n=193)

2 months: Follow up with questionnaires by post

12 months: Follow up in routine data sets
